# Supplementary material for: Dementia Caregiver Experiences and Recommendations for Using the Behavioral and Environmental Sensing and Intervention System at Home: Usability and Acceptability Study
Source: PubMed Central journal article supplement (PMC8691404; doi:10.2196/30353), 2021-12-06
Supplement: aging_v4i4e30353_app1.pdf [file aging_v4i4e30353_app1.pdf]

**CANIS Multimedia Appendix 1: Assessment tool descriptions for creating individualized recommendations for both caregivers and persons living with dementia**

| <b>MEASURES CAREGIVER STATUS</b> |                                                                                                                                                                                                                                                                                                                               |                 |                    |                                                               |
|----------------------------------|-------------------------------------------------------------------------------------------------------------------------------------------------------------------------------------------------------------------------------------------------------------------------------------------------------------------------------|-----------------|--------------------|---------------------------------------------------------------|
| <b>Scale</b>                     | <b>Scale Description</b>                                                                                                                                                                                                                                                                                                      | <b>Variable</b> | <b>Total Score</b> | <b>Scoring Level</b>                                          |
| CES-D                            | Depression in caregivers. rarely=0, some=1, occasional=2, most=3; Total out of 60. Higher score= more symptomatology                                                                                                                                                                                                          | S<br>Dep        | 60                 | Lower = Less depression symptomology                          |
| PSQI                             | 7 components are each scored from 0 (no difficulty) to 3 (severe difficulty) then added. The total global score ranges from 0 to 21, with higher scores for worse quality of sleep, >5 indicating poor sleep quality as well as severe difficulties in at least two areas, or moderate difficulties in more than three areas. | S               | 21                 | Lower = Better sleep quality                                  |
| RSSE-respite                     | 0-100% confidence in rating efficacy/ confidence today in 3 categories, obtaining respite.                                                                                                                                                                                                                                    | S<br>Emp        | 100                | Higher = Greater self-efficacy obtaining respite              |
| RSSE-behaviors                   | 0-100% confidence in rating efficacy/ confidence today in 3 categories, responding to disruptive patient behaviors.                                                                                                                                                                                                           | S<br>Emp        | 100                | Higher = Greater self-efficacy responding to behaviors        |
| RSSE-thoughts                    | 0-100% confidence in rating efficacy/ confidence today in 3 categories, controlling upsetting thoughts about caregiving.                                                                                                                                                                                                      | S<br>Emp        | 100                | Higher = Greater self-efficacy controlling upsetting thoughts |
| Zarit                            | Measures caregiver burden: $\geq 17/48$ severe/high burden, 0-12 little or no burden, 13-24 mild to moderate, 25-36 moderate to severe, 37-48 severe                                                                                                                                                                          | S               | 48                 | Lower = Less feelings of caregiver burden                     |
| CSI                              | CG strain index: Any score 7 or higher indicates high level of caregiver strain (in CANIS study only)                                                                                                                                                                                                                         | S               | 13                 | Higher = Greater caregiver strain, $\geq 7$ = strain          |

| MEASURES STATUS IN PERSONS LIVING WITH DEMENTIA |                                                                                                                                                                                                                                                                                                                                      |           |             |                                                                                               |
|-------------------------------------------------|--------------------------------------------------------------------------------------------------------------------------------------------------------------------------------------------------------------------------------------------------------------------------------------------------------------------------------------|-----------|-------------|-----------------------------------------------------------------------------------------------|
| Scale                                           | Scale Description                                                                                                                                                                                                                                                                                                                    | Variable  | Total Score | Scoring Level                                                                                 |
| 3MS                                             | A measure of cognitive impairment. Total = 100 points                                                                                                                                                                                                                                                                                | CI        | 100         | Lower = More impairment<br>< 79 = cognitive impairment                                        |
| NPI-Q SS                                        | NPI-Q consists of the Symptom Severity score and the Caregiver Distress score to any of 12 symptoms present in the last month. The total NPI-Q severity score (0-3) represents the sum of individual symptom scores and ranges from 0 to 36.                                                                                         | Ag        | 36          | Lower = Less severe symptoms<br><br>Mild = 0-12, Mod = 13-24, severe = 25-36                  |
| NPI-Q CGD                                       | NPI-Q consists of the Symptom Severity score and the Caregiver Distress score (0-5). The total NPI-Q distress score represents the sum of individual symptom scores and ranges from 0 to 60.                                                                                                                                         | Beh       | 60          | Lower = Less caregiver distress<br><br>Mild = <25, Mod = 25-36, severe = >36                  |
| CMAI-C frequency                                | 2 measures: frequency of behaviors (highest score is 203)                                                                                                                                                                                                                                                                            | Ag        | 203         | Lower = Less frequent occurrence of behavior in past 2 weeks                                  |
| CMAI-C behavior occurrence                      | 2 measures: occurrence of behaviors that score ≥2, which means behavior occurred. The total number of behaviors with scores ≥2 is out of 29.                                                                                                                                                                                         | Ag        | 29          | Lower = Fewer behaviors that occur at all                                                     |
| CDS                                             | Rates depression in PWD (by caregiver observation of severity) as well as interview and observation of PWD. 0(absent), 1(mild-intermittent), 2(severe).                                                                                                                                                                              | CI<br>Dep | 38          | Lower = Less depression,<br>>12 = Probable depression                                         |
| QoL-AD                                          | Poor=1, Fair=2, Good=3, Excellent=4. Total out of 52<br>Contains 2 measures – one each from the caregiver and the interviewer                                                                                                                                                                                                        | Beh       | 52          | Higher = Greater quality of life<br>Poor = <13, Fair = 13-26, Good = 27-39, Excellent= 40-52. |
| Barthel                                         | Scores: 0-20 = “total” dependency, 21-60 = “severe” dependency, 61-90 = “moderate” dependency, and 91-99 = “slight” dependency. Most studies apply <b>the 60/61 cutting point</b> , with the stipulation that the Barthel Index should not be used alone for predicting outcomes. 100 x (observed score - minimum score)/score range | Beh       | 100         | Higher = Greater independence in ADLs                                                         |
| CDR                                             | Clinical Dementia Rating<br>Average of score from each section out of 3                                                                                                                                                                                                                                                              | CI        | 3           | Lower = Less impaired                                                                         |
| FAST                                            | Stages normal to severe Alzheimer’s Disease (1-7). For statistical analysis, each stage is converted to a numerical value (0-16)                                                                                                                                                                                                     | CI        | 16          | Higher = More impairment                                                                      |

|      |                                                                                                                                                                                                                                                                                                                               |                  |    |                                     |
|------|-------------------------------------------------------------------------------------------------------------------------------------------------------------------------------------------------------------------------------------------------------------------------------------------------------------------------------|------------------|----|-------------------------------------|
| PSQI | 7 components are each scored from 0 (no difficulty) to 3 (severe difficulty) then added. The total global score ranges from 0 to 21, with higher scores for worse quality of sleep, >5 indicating poor sleep quality as well as severe difficulties in at least two areas, or moderate difficulties in more than three areas. | Beh<br>Dep<br>CI | 21 | Lower scores = Better sleep quality |
|------|-------------------------------------------------------------------------------------------------------------------------------------------------------------------------------------------------------------------------------------------------------------------------------------------------------------------------------|------------------|----|-------------------------------------|

Variable abbreviations:

Ag – Agitation; Beh – Behavior; CI – Cognitive Impairment; Dep-Depression; Emp-Empowerment; S-Stress/Strain

Assessment scale abbreviations:

CES-D: Center for Epidemiologic Studies Depression Scale; PSQI: Pittsburg Sleep Quality Index; RSSE: Revised Scale for Caregiving Self-Efficacy; Zarit: Zarit Burden Scale-short for; CSI: Caregiver Strain Index; 3MS: Modified Mini-Mental Exam; NPI-Q: Neuropsychiatric Index-Brief (SS-Symptom Severity, CGD-Caregiver distress); CMAI: Cohen-Mansfield Agitation inventory – Community, CDS: Cornell Scale for Depression in Dementia; QoL-AD: Quality of Life-Alzheimer’s Disease; CDR: Clinical Dementia Rating Scale; FAST: Functional Assessment Staging in Alzheimer’s disease.
